# Supplementary material
Source: publisher figshare collection journal article supplement (https://tandf.figshare.com/articles/dataset/_/5985001)
Supplement: Supplementary file 1 [file 2]

# Supplementary Material for “Statistical Inference in a Directed Network Model with Covariates”

This supplementary material contains the histograms of the estimated out-degree and in-degree parameters for the Sino Weibo data, the proofs for Theorems 1 and 3, and the proof of Lemma 4 in the main text. Section 2 presents the preliminaries that will be used in the proofs. The proofs of Theorems 1 and 3 are in sections 3 and 4, respectively. Section 5 presents the proof of Lemma 4.

## 1 Histograms of estimates of degree parameters fitted in the Sino Weibo data

Figure 1 provides the histograms of  $\hat{\alpha}_i$ 's and  $\hat{\beta}_j$ 's for the Sino Weibo data with 2242 nodes.

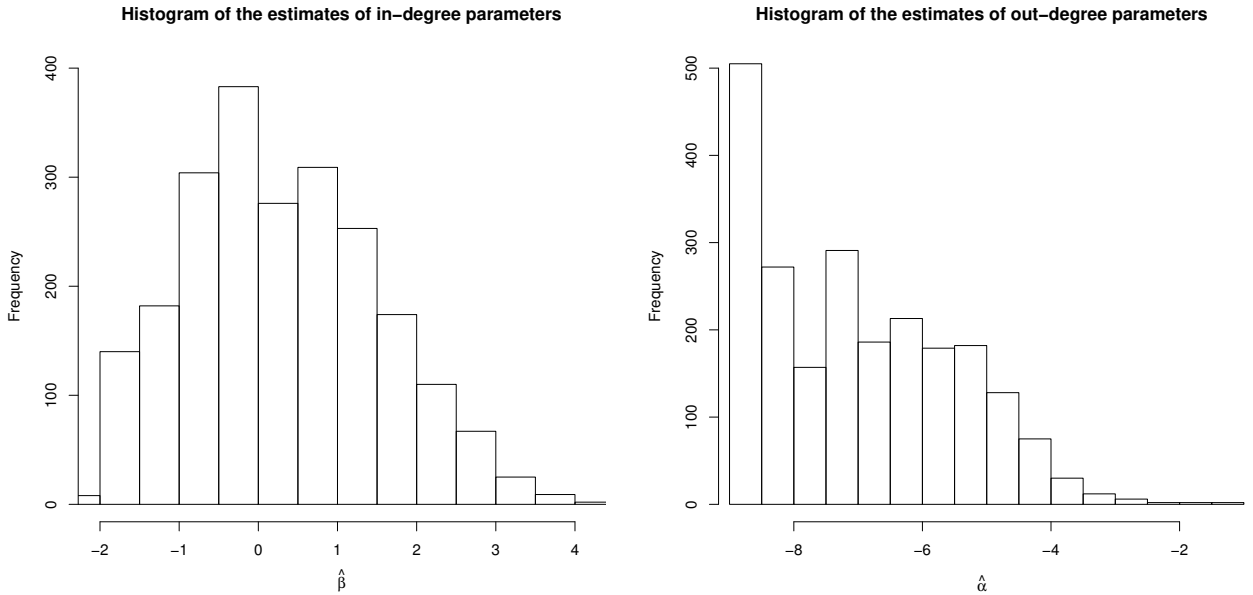

Figure 1: The histogram of the estimates of the in-degree (left) and out-degree (right) parameters in the Sino Weibo data.

## 2 Preliminaries

We first restate Lemma 1 giving the upper bound of the approximate error using  $S$  to approximate the inverse of the matrix  $V$  in the main text here for clarity.

**Lemma 5.** *If  $V \in \mathcal{L}_n(m, M)$  with  $M/m = o(n)$ , then for large enough  $n$ ,*

$$\|V^{-1} - S\| \leq \frac{c_1 M^2}{m^3(n-1)^2},$$

where  $c_1$  is a constant that does not depend on  $M$ ,  $m$  and  $n$ , and  $\|A\| := \max_{i,j} |a_{i,j}|$  for a general matrix  $A = (a_{i,j})$ .

Let  $D$  be an open convex subset of  $\mathbb{R}^{2n-1}$ ,  $\Omega(\mathbf{x}, r)$  denote the open ball  $\{\mathbf{y} \in \mathbb{R}^{2n-1} : \|\mathbf{x} - \mathbf{y}\|_\infty < r\}$  and  $\overline{\Omega(\mathbf{x}, r)}$  be its closure, where  $\mathbf{x} \in \mathbb{R}^{2n-1}$ . In order to characterize the rate of convergence of the Newton's iterative sequence for the function defined in equation (7) in the main text, we quote the theorem 7 from Yan et al. (2016), stated as one lemma below.

**Lemma 6** (Yan et al. (2016)). *Define a system of equations:*

$$\begin{aligned} F_i(\boldsymbol{\theta}) &= d_i - \sum_{k=1, k \neq i}^n f(\alpha_i + \beta_k), \quad i = 1, \dots, n, \\ F_{n+j}(\boldsymbol{\theta}) &= b_j - \sum_{k=1, k \neq j}^n f(\alpha_k + \beta_j), \quad j = 1, \dots, n-1, \\ F(\boldsymbol{\theta}) &= (F_1(\boldsymbol{\theta}), \dots, F_n(\boldsymbol{\theta}), F_{n+1}(\boldsymbol{\theta}), \dots, F_{2n-1}(\boldsymbol{\theta}))^\top, \end{aligned}$$

where  $f(\cdot)$  is a continuous function with the third derivative. Let  $D \subset \mathbb{R}^{2n-1}$  be a convex set and assume for any  $\mathbf{x}, \mathbf{y}, \mathbf{v} \in D$ , we have

$$\|[F'(\mathbf{x}) - F'(\mathbf{y})]\mathbf{v}\|_\infty \leq K_1 \|\mathbf{x} - \mathbf{y}\|_\infty \|\mathbf{v}\|_\infty, \quad (1)$$

$$\max_{i=1, \dots, 2n-1} \|F'_i(\mathbf{x}) - F'_i(\mathbf{y})\|_\infty \leq K_2 \|\mathbf{x} - \mathbf{y}\|_\infty, \quad (2)$$

where  $F'(\boldsymbol{\theta})$  is the Jacobin matrix of  $F$  on  $\boldsymbol{\theta}$  and  $F'_i(\boldsymbol{\theta})$  is the gradient function of  $F_i$  on  $\boldsymbol{\theta}$ . Consider  $\boldsymbol{\theta}^{(0)} \in D$  with  $\Omega(\boldsymbol{\theta}^{(0)}, 2r) \subset D$ , where  $r = \|[F'(\boldsymbol{\theta}^{(0)})]^{-1}F(\boldsymbol{\theta}^{(0)})\|_\infty$ . For any  $\boldsymbol{\theta} \in \Omega(\boldsymbol{\theta}^{(0)}, 2r)$ , we assume that  $F'(\boldsymbol{\theta}) \in \mathcal{L}_n(m, M)$  or  $-F'(\boldsymbol{\theta}) \in \mathcal{L}_n(m, M)$ . For  $k = 1, 2, \dots$ , define the Newton iterates  $\boldsymbol{\theta}^{(k+1)} = \boldsymbol{\theta}^{(k)} - [F'(\boldsymbol{\theta}^{(k)})]^{-1}F(\boldsymbol{\theta}^{(k)})$ . Let

$$\rho = \frac{c_1(2n-1)M^2K_1}{2m^3n^2} + \frac{K_2}{(n-1)m}. \quad (3)$$

If  $\rho r < 1/2$ , then  $\boldsymbol{\theta}^{(k)} \in \Omega(\boldsymbol{\theta}^{(0)}, 2r)$ ,  $k = 1, 2, \dots$ , are well-defined and satisfy

$$\|\boldsymbol{\theta}^{(k+1)} - \boldsymbol{\theta}^{(0)}\|_\infty \leq r/(1 - \rho r). \quad (4)$$

Further,  $\lim_{k \rightarrow \infty} \boldsymbol{\theta}^{(k)}$  exists and the limiting point is precisely the solution of  $F(\boldsymbol{\theta}) = 0$  in the range of  $\boldsymbol{\theta} \in \Omega(\boldsymbol{\theta}^{(0)}, 2r)$ .

Regarding the asymptotic normality of  $g_i - \mathbb{E}(g_i)$ , we note that both  $d_i = \sum_{k \neq i} a_{i,k}$  and  $b_j = \sum_{k \neq j} a_{k,j}$  are sums of  $n - 1$  independent Bernoulli random variables. By the central limit theorem for the bounded case in Loève (1977, p.289), we know that  $v_{i,i}^{-1/2}(d_i - \mathbb{E}(d_i))$  and  $v_{n+j,n+j}^{-1/2}(b_j - \mathbb{E}(b_j))$  are asymptotically standard normal if  $v_{i,i}$  diverges. Since we assume that  $Z_{ij}$ 's lie in a compact subset of  $\mathbb{R}^p$  and the parameter space  $\Theta$  of covariate parameters is compact, we have for all  $i \neq j$ ,

$$\max_{\boldsymbol{\gamma} \in \Theta} |Z_{ij}^\top \boldsymbol{\gamma}| \leq \kappa, \quad (5)$$

where  $\kappa$  is a constant. Since  $e^x/(1 + e^x)^2$  is a decreasing function on  $x$  when  $x \geq 0$  and an increasing function when  $x \leq 0$ , we have

$$\frac{(n-1)e^{2\|\boldsymbol{\theta}^*\|_\infty + \kappa}}{(1 + e^{2\|\boldsymbol{\theta}^*\|_\infty + \kappa})^2} \leq v_{i,i} = \sum_{j \neq i} \frac{e^{Z_{ij}^\top \boldsymbol{\gamma}^* + \alpha_i^* + \beta_j^*}}{(1 + e^{Z_{ij}^\top \boldsymbol{\gamma}^* + \alpha_i^* + \beta_j^*})^2} \leq \frac{n-1}{4}, \quad i = 1, \dots, 2n. \quad (6)$$

When  $\|\boldsymbol{\theta}^*\|_\infty \leq \tau \log n$  for  $\tau < 1/24$ , both the lower and upper bounds go to  $\infty$  as  $n \rightarrow \infty$ . Thus, we have the following proposition.

**Proposition 1.** *Assume that  $A \sim \mathbb{P}_{\boldsymbol{\gamma}^*, \boldsymbol{\theta}^*}$  with  $\boldsymbol{\gamma}^* \in \Gamma$ . If  $e^{\|\boldsymbol{\theta}^*\|_\infty} = o(n^{1/2})$ , then for any fixed  $k \geq 1$ , as  $n \rightarrow \infty$ , the vector consisting of the first  $k$  elements of  $S\{\mathbf{g} - \mathbb{E}(\mathbf{g})\}$  is asymptotically multivariate normal with mean zero and covariance matrix given by the upper left  $k \times k$  block of  $S$ .*

### 3 Proofs for Theorem 1

The proof is similar to the proof of Theorem 1 in Yan et al. (2016) and we only give the different steps here. Recall the definition of  $F_\gamma(\boldsymbol{\theta})$  in equation (7) in the main text. For notation convenience, we suppress the subscript  $\gamma$  in  $F_\gamma(\boldsymbol{\theta})$  here. Then the Jacobin matrix  $F'(\boldsymbol{\theta})$  of  $F(\boldsymbol{\theta})$  can be calculated as follows. For  $i = 1, \dots, n$ ,

$$\frac{\partial F_i}{\partial \alpha_l} = 0, \quad l = 1, \dots, n, \quad l \neq i; \quad \frac{\partial F_i}{\partial \alpha_i} = - \sum_{k=1; k \neq i}^n \frac{e^{Z_{ij}^\top \boldsymbol{\gamma} + \alpha_i + \beta_k}}{(1 + e^{\alpha_i + \beta_k})^2},$$

$$\frac{\partial F_i}{\partial \beta_j} = -\frac{e^{Z_{ij}^\top \gamma + \alpha_i + \beta_j}}{(1 + e^{Z_{ij}^\top \gamma + \alpha_i + \beta_j})^2}, \quad j = 1, \dots, n-1, \quad j \neq i; \quad \frac{\partial F_i}{\partial \beta_i} = 0$$

and for  $j = 1, \dots, n-1$ ,

$$\frac{\partial F_{n+j}}{\partial \alpha_l} = -\frac{e^{Z_{lj}^\top \gamma + \alpha_l + \beta_j}}{(1 + e^{Z_{lj}^\top \gamma + \alpha_l + \beta_j})^2}, \quad l = 1, \dots, n, \quad l \neq j; \quad \frac{\partial F_{n+j}}{\partial \alpha_j} = 0,$$

$$\frac{\partial F_{n+j}}{\partial \beta_j} = -\sum_{k=1; k \neq j}^n \frac{e^{Z_{kj}^\top \gamma + \alpha_k + \beta_j}}{(1 + e^{Z_{kj}^\top \gamma + \alpha_k + \beta_j})^2}, \quad \frac{\partial F_{n+j}}{\partial \beta_l} = 0, \quad l = 1, \dots, n-1.$$

It is easily verified that  $-F'(\boldsymbol{\theta}) \in \mathcal{L}_n(m, M)$ . Thus Lemmas 5 and 6 can be applied. Note that  $\boldsymbol{\gamma}^*$  and  $\boldsymbol{\theta}^*$  denote the true parameter vector. For every  $\boldsymbol{\gamma} \in \Theta$ , the constants  $K_1$ ,  $K_2$  and  $r$  in Lemma 6 are given in the following.

**Lemma 7.** Take  $D = R^{2n-1}$  and  $\boldsymbol{\theta}^{(0)} = \boldsymbol{\theta}^*$  in Lemma 6. Assume that  $\boldsymbol{\gamma} \in \Theta$  and

$$\max\left\{\max_{i=1, \dots, n} |d_i - \mathbb{E}(d_i)|, \max_{j=1, \dots, n} |b_j - \mathbb{E}(b_j)|\right\} \leq \sqrt{(n-1) \log(n-1)}. \quad (7)$$

Then we can choose the constants  $K_1$ ,  $K_2$  and  $r$  in Lemma 6 as

$$K_1 = n-1, \quad K_2 = \frac{n-1}{2}, \quad r \leq \frac{(\log n)^{1/2}}{n^{1/2}} (c_{11} e^{6\|\boldsymbol{\theta}^*\|_\infty} + c_{12} e^{2\|\boldsymbol{\theta}^*\|_\infty}),$$

where  $c_{11}$  and  $c_{12}$  are constants.

*Proof.* The proof is similar to the proof of Lemma 2 in Yan et al. (2016). Note that  $-F'(\boldsymbol{\theta}^*) \in \mathcal{L}_{2n-1}(m_*, M_*)$ , where

$$M_* = \frac{1}{4}, \quad m_* = \frac{e^{2\|\boldsymbol{\theta}^*\|_\infty + \kappa}}{(1 + e^{2\|\boldsymbol{\theta}^*\|_\infty + \kappa})^2}.$$

The left proof only requires verification of the fact that all the steps hold when we replace  $F'_i(\boldsymbol{\theta})$  in Yan et al. (2016) with the new expression here. □

Since the out- and in-degree of each node are a sequence of independent Bernoulli random variables, Lemma 3 in Yan et al. (2016) assures that condition (7) holds with a large probability.

**Lemma 8** (Lemma 3 in Yan et al. (2016)). *With probability at least  $1 - 4n/(n-1)^2$ , we have*

$$\max\left\{\max_i |d_i - \mathbb{E}(d_i)|, \max_j |b_j - \mathbb{E}(b_j)|\right\} \leq \sqrt{(n-1) \log(n-1)}.$$

Combining the above two lemmas, we have the result of consistency.

*Proof of Theorem 1.* Assume that  $\gamma \in \Theta$  and condition (7) holds. Recall the Newton's iterates  $\boldsymbol{\theta}^{(k+1)} = \boldsymbol{\theta}^{(k)} - [F'(\boldsymbol{\theta}^{(k)})]^{-1}F(\boldsymbol{\theta}^{(k)})$  with  $\boldsymbol{\theta}^{(0)} = \boldsymbol{\theta}^*$ . Let  $r = O((\log n)^{1/2}e^{6\|\boldsymbol{\theta}^*\|_\infty}n^{-1/2})$  given in Lemma 6. If  $\boldsymbol{\theta} \in \Omega(\boldsymbol{\theta}^*, 2r)$ , then  $-F'(\boldsymbol{\theta}) \in \mathcal{L}_n(m, M)$  with

$$M = \frac{1}{4}, \quad m = \frac{e^{2(\|\boldsymbol{\theta}^*\|_\infty + 2r + \kappa)}}{(1 + e^{2(\|\boldsymbol{\theta}^*\|_\infty + 2r + \kappa)})^2}.$$

Then similar to derive the bound of  $\rho r$  in the proof of Theorem 1 in Yan et al. (2016), by Lemma 7 and condition (7), we have for sufficiently small  $r$ :

$$\rho r = O\left(\frac{(\log n)^{1/2}e^{12\|\boldsymbol{\theta}^*\|_\infty}}{n^{1/2}}\right).$$

Therefore, if  $\|\boldsymbol{\theta}^*\|_\infty \leq \tau \log n$ , then  $\rho r \rightarrow 0$  as  $n \rightarrow \infty$ . Consequently, by Lemma 6,  $\lim_{n \rightarrow \infty} \widehat{\boldsymbol{\theta}}^{(n)}$  exists. Denote the limit as  $\widehat{\boldsymbol{\theta}}$ , then it satisfies

$$\|\widehat{\boldsymbol{\theta}} - \boldsymbol{\theta}^*\|_\infty \leq 2r = O\left(\frac{(\log n)^{1/2}e^{8\|\boldsymbol{\theta}^*\|_\infty}}{n^{1/2}}\right) = o(1).$$

By Lemma 8, condition (7) holds with probability approaching one, thus the above inequality also holds with probability approaching one. Here,  $\widehat{\boldsymbol{\theta}}(\gamma)$  depends on  $\gamma$  and the above inequality holds for every  $\gamma \in \Theta$ . Since  $\widehat{\gamma} \in \Theta$ , it shows the consistency of the MLE  $\widehat{\boldsymbol{\theta}}$ . Since the likelihood is convex, if  $\widehat{\boldsymbol{\theta}}$  exists, then it is unique.  $\square$

## 4 Proofs for Theorem 3

The method of the proof of Theorem 3 follows the proof of Theorem 2 in Yan et al. (2016). Before proving Theorem 3, we first establish two lemmas.

**Lemma 9.** *Let  $R = V^{-1} - S$  and  $U = \text{Cov}[R\{\mathbf{g} - \mathbb{E}\mathbf{g}\}]$ . Then*

$$\|U\| \leq \|V^{-1} - S\| + \frac{3(1 + e^{2\|\boldsymbol{\theta}^*\|_\infty + \kappa})^4}{4e^{4\|\boldsymbol{\theta}^*\|_\infty + 2\kappa}(n-1)^2}. \quad (8)$$

*Proof.* Note that

$$U = WVW^\top = (V^{-1} - S) - S(I - VS),$$

where  $I$  is a  $(2n-1) \times (2n-1)$  diagonal matrix, and by the inequality (C3) in Yan et al. (2016), we have

$$|\{S(I - VS)\}_{i,j}| \leq \frac{3(1 + e^{2\|\boldsymbol{\theta}^*\|_\infty + \kappa})^4}{4e^{4\|\boldsymbol{\theta}^*\|_\infty + 2\kappa}(n-1)^2}.$$

Thus,

$$\|U\| \leq \|V^{-1} - S\| + \|S(I_{2n-1} - VS)\| \leq \|V^{-1} - S\| + \frac{3(1 + e^{2\|\boldsymbol{\theta}^*\|_\infty + \kappa})^4}{4e^{4\|\boldsymbol{\theta}^*\|_\infty + 2\kappa}(n-1)^2}.$$

□

**Lemma 10.** Assume that the conditions in Theorem 1 hold. If  $\|\boldsymbol{\theta}^*\|_\infty \leq \tau \log n$  and  $\tau < 1/40$ , then for any  $i$ ,

$$\widehat{\boldsymbol{\theta}}_i - \boldsymbol{\theta}_i^* = ([V(\widehat{\boldsymbol{\gamma}})]^{-1}\{\mathbf{g} - \mathbb{E}(\mathbf{g})\})_i + o_p(n^{-1/2}), \quad (9)$$

where  $V(\widehat{\boldsymbol{\gamma}})$  is a matrix by replacing  $\boldsymbol{\gamma}$  in  $V$  with its estimator  $\widehat{\boldsymbol{\gamma}}$ .

*Proof.* The proof follows the same line of arguments as the proof of Lemma 9 in Yan et al. (2016). The main difference is that the Taylor expansion for  $\mathbf{g} - \mathbb{E}(\mathbf{g})$  contains one more term since it has the covariate term. We only present the different steps here. Let  $\widehat{\xi}_{i,j} = \widehat{\alpha}_i + \widehat{\beta}_j - \alpha_i^* - \beta_j^*$ . Specially, by Taylor's expansion, for any  $1 \leq i \neq j \leq n$ ,

$$\frac{e^{Z_{ij}^\top \widehat{\boldsymbol{\gamma}} + \widehat{\alpha}_i + \widehat{\beta}_j}}{1 + e^{Z_{ij}^\top \widehat{\boldsymbol{\gamma}} + \widehat{\alpha}_i + \widehat{\beta}_j}} - \frac{e^{Z_{ij}^\top \widehat{\boldsymbol{\gamma}} + \alpha_i^* + \beta_j^*}}{1 + e^{Z_{ij}^\top \widehat{\boldsymbol{\gamma}} + \alpha_i^* + \beta_j^*}} = \frac{e^{Z_{ij}^\top \widehat{\boldsymbol{\gamma}} + \alpha_i^* + \beta_j^*}}{(1 + e^{Z_{ij}^\top \widehat{\boldsymbol{\gamma}} + \alpha_i^* + \beta_j^*})^2} \widehat{\xi}_{i,j} + h_{i,j},$$

where

$$h_{i,j} = \frac{e^{Z_{ij}^\top \widehat{\boldsymbol{\gamma}} + \alpha_i^* + \beta_j^* + \phi_{i,j} \widehat{\xi}_{i,j}} (1 - e^{Z_{ij}^\top \widehat{\boldsymbol{\gamma}} + \alpha_i^* + \beta_j^* + \phi_{i,j} \widehat{\xi}_{i,j}})}{(1 + e^{Z_{ij}^\top \widehat{\boldsymbol{\gamma}} + \alpha_i^* + \beta_j^* + \phi_{i,j} \widehat{\xi}_{i,j}})^3} \widehat{\xi}_{i,j}^2,$$

and  $0 \leq \phi_{i,j} \leq 1$ . Let

$$t_{i,j} := \frac{e^{Z_{ij}^\top \widehat{\boldsymbol{\gamma}} + \alpha_i + \beta_j}}{1 + e^{Z_{ij}^\top \widehat{\boldsymbol{\gamma}} + \alpha_i + \beta_j}} - \frac{e^{Z_{ij}^\top \boldsymbol{\gamma}^* + \alpha_i^* + \beta_j^*}}{1 + e^{Z_{ij}^\top \boldsymbol{\gamma}^* + \alpha_i^* + \beta_j^*}} = \frac{Z_{ij}^\top e^{Z_{ij}^\top \widehat{\boldsymbol{\gamma}} + \alpha_i^* + \beta_j^*}}{(1 + e^{Z_{ij}^\top \widehat{\boldsymbol{\gamma}} + \alpha_i^* + \beta_j^*})^2} (\widehat{\boldsymbol{\gamma}} - \boldsymbol{\gamma}^*),$$

where  $\widetilde{\boldsymbol{\gamma}}$  lies in between  $\widehat{\boldsymbol{\gamma}}$  and  $\boldsymbol{\gamma}^*$ . In the above equation, the second equation is due to the mean value theorem. By the likelihood equation (3) in the main paper, we have

$$\mathbf{g} - \mathbb{E}(\mathbf{g}) = V(\widehat{\boldsymbol{\gamma}})(\widehat{\boldsymbol{\theta}} - \boldsymbol{\theta}^*) + \mathbf{h} + \mathbf{t},$$

where  $\mathbf{h} = (h_1, \dots, h_{2n-1})^\top$ ,  $\mathbf{t} = (t_1, \dots, t_{2n-1})^\top$  and,

$$\begin{aligned} h_i &= \sum_{k=1, k \neq i}^n h_{i,k}, \quad i = 1, \dots, n, \quad h_{n+i} = \sum_{k=1, k \neq i}^n h_{k,i}, \quad i = 1, \dots, n-1, \\ t_i &= \sum_{k=1, k \neq i}^n t_{i,k}, \quad i = 1, \dots, n, \quad t_{n+i} = \sum_{k=1, k \neq i}^n t_{k,i}, \quad i = 1, \dots, n-1. \end{aligned}$$

Equivalently,

$$\widehat{\boldsymbol{\theta}} - \boldsymbol{\theta}^* = [V(\widehat{\boldsymbol{\gamma}})]^{-1}(\mathbf{g} - \mathbb{E}(\mathbf{g})) + [V(\widehat{\boldsymbol{\gamma}})]^{-1}\mathbf{h} + [V(\widehat{\boldsymbol{\gamma}})]^{-1}\mathbf{t}. \quad (10)$$

The upper bound for  $|[V(\hat{\gamma})]^{-1}\mathbf{t}]_i|$  can be derived as follows. By noting that  $e^x/(1+e^x) \leq 1/4$  and  $Z_{ij}$  is bounded by a constant, we have

$$\|t_{i,j}\|_\infty \leq \frac{c}{4} \|\hat{\gamma} - \gamma^*\|_\infty,$$

where  $c$  is a constant. Therefore,

$$|[V(\hat{\gamma})]^{-1}\mathbf{t}]_i| \leq |[S(\hat{\gamma})\mathbf{t}]_i| + |[R(\hat{\gamma})\mathbf{t}]_i| \leq \frac{|t_i|}{\hat{v}_{ii}} + \frac{|t_{2n}|}{\hat{v}_{2n,2n}} + \|R\|_\infty \times [(2n-1) \max_i |t_i|] = o(n^{-1/2}).$$

□

*Proof of Theorem 3.* Note that equation (10) holds. By Lemmas 9 and 10, if  $\|\boldsymbol{\theta}^*\|_\infty \leq \tau \log n$  and  $\tau < 1/44$ , then

$$(\hat{\boldsymbol{\theta}} - \boldsymbol{\theta})_i = [S(\hat{\gamma})\{\mathbf{g} - \mathbb{E}(\mathbf{g})\}]_i + o_p(n^{-1/2}).$$

Since  $[S(\hat{\gamma})]_{r \times r}$  is a consistent estimator of  $S_{r \times r}$  for a fixed  $r$ , Theorem 3 follows directly from Proposition 1. □

## 5 Proof for Lemma 4

Since  $a_{ij}$ 's for  $1 \leq i \neq j \leq n$  are independent random variables and  $s_{\gamma_{ij}}^*(\gamma^*, \boldsymbol{\theta}^*)$  is only associated with the random variable  $a_{ij}$ , the  $n(n-1)$  random variables  $s_{\gamma_{ij}}^*(\gamma^*, \boldsymbol{\theta}^*)$  ( $1 \leq i \neq j \leq n$ ) are also independent. Next, we will show that  $s_{\gamma_{ij}}^*(\gamma^*, \boldsymbol{\theta}^*)$  is a bounded random vector. Since  $s_{\gamma_{ij}}(\gamma^*, \boldsymbol{\theta}^*)$  is a bounded random vector, it is sufficient to show that  $H_{\gamma\boldsymbol{\theta}} H_{\boldsymbol{\theta}\boldsymbol{\theta}}^{-1} s_{\theta_{ij}}(\gamma^*, \boldsymbol{\theta}^*)$  is bounded.

By calculations, we have

$$\begin{aligned} (-H_{\gamma\boldsymbol{\theta}}S)_{,i} &= \frac{\sum_{j \neq i} p_{ij}(1-p_{ij})Z_{ij}}{v_{ii}} + \frac{\sum_{i \neq n} p_{in}(1-p_{in})Z_{in}}{v_{2n,2n}}, \quad i = 1, \dots, n, \\ (-H_{\gamma\boldsymbol{\theta}}S)_{,n+j} &= \frac{\sum_{i \neq j} p_{ij}(1-p_{ij})Z_{ij}}{v_{n+j,n+j}} - \frac{\sum_{i \neq n} p_{in}(1-p_{in})Z_{in}}{v_{2n,2n}}, \quad i = 1, \dots, n. \end{aligned}$$

Therefore,

$$(-H_{\gamma\boldsymbol{\theta}}S)T_{ij} = \frac{\sum_{j \neq i} p_{ij}(1-p_{ij})Z_{ij}}{v_{ii}} + \frac{\sum_{i \neq j} p_{ij}(1-p_{ij})Z_{ij}}{v_{n+j,n+j}}. \quad (11)$$

By lemma (5), we have

$$\|H_{\gamma\theta}W\| \leq (2n-1) \times \frac{c_1 M^2}{m^3(n-1)^2} \times \frac{1}{4} \|Z_{ij}\|. \quad (12)$$

Combining (11) and (12), we have

$$\begin{aligned} & | [(-H_{\gamma\theta})(-H_{\theta\theta})^{-1}T_{ij}]_k | \\ &= | (-H_{\gamma\theta}ST_{ij})_k - (H_{\gamma\theta}WT_{ij})_k | \\ &\leq \frac{\sum_{j \neq i} p_{ij}(1-p_{ij})Z_{ij,k}}{v_{ii}} + \frac{\sum_{i \neq j} p_{ij}(1-p_{ij})Z_{ij,k}}{v_{n+j,n+j}} + 2(2n-1) \times \frac{c_1 M^2}{m^3(n-1)^2} \times \frac{1}{4} \|Z_{ij,k}\| \\ &= O(1). \end{aligned}$$

Since

$$(-H_{\gamma\theta})(-H_{\theta\theta})^{-1}s_{\theta_{ij}}(\gamma^*, \theta^*) = (-H_{\gamma\theta})(-H_{\theta\theta})^{-1}T_{ij}(a_{ij} - \frac{e^{Z_{ij}^\top \gamma + \alpha_i + \beta_j}}{1 + e^{Z_{ij}^\top \gamma + \alpha_i + \beta_j}}),$$

it shows that each element of  $H_{\gamma\theta}H_{\theta\theta}^{-1}s_{\theta_{ij}}(\gamma^*, \theta^*)$  is bounded. It can be checked that

$$\begin{aligned} & \text{Var}(\sum_i \sum_{j \neq i} s_{\gamma_{ij}}^*(\gamma^*, \theta^*)) \\ &= \sum_i \sum_{j \neq i} p_{ij}(1-p_{ij})(Z_{ij}Z_{ij}^\top - 2Z_{ij}(H_{\gamma\theta}H_{\theta\theta}^{-1}T_{ij})^\top + H_{\gamma\theta}H_{\theta\theta}^{-1}T_{ij}T_{ij}^\top H_{\theta\theta}^{-1}H_{\gamma\theta}^\top) \\ &= NI_n(\gamma^*). \end{aligned}$$

Then Lemma 4 follows by the central limit theorem for the bounded case in Lo  ve (1977, p.289).

## References

- Lang, S. (1993). Real and Functional Analysis. Springer.
- Lo  ve, M. (1977). *Probability theory I*. 4th ed. Springer, New York.
- Yan, T., Leng, C. and Zhu, J. (2016). Asymptotics in directed exponential random graph models with an increasing bi-degree sequence. *The Annals of Statistics*, **44**, 31–57.
