# Supplementary material
Source: publisher figshare collection journal article supplement (https://tandf.figshare.com/articles/dataset/_/5985001)
Supplement: Supplementary file 2 [file 2]

# Supplement to “Statistical Inference in a Directed Network Model with Covariates”

Ting Yan<sup>\*</sup>    Binyan Jiang<sup>†</sup>    Stephen E. Fienberg<sup>‡</sup>    Chenlei Leng<sup>§</sup>

## 1 Appendix: Proofs for theorems

In this section we give the proofs for Theorems 2 and 4 in Section 3, and the proofs for Theorems 1 and 3 are put in the online supplementary material.

### 1.1 Proof of Theorem 2

Recall that  $\boldsymbol{\theta} = (\boldsymbol{\alpha}, \boldsymbol{\beta})$ . In what follows, the calculations are based on the condition that  $\boldsymbol{\gamma} \in \Gamma$ ,  $\|\boldsymbol{\theta}\|_\infty \leq n^\tau$ , where  $\tau \in (0, 1/2)$  is a positive constant. By calculations, we have

$$\begin{aligned}\ell(\boldsymbol{\gamma}, \boldsymbol{\theta}) &= \ell(\boldsymbol{\gamma}, \boldsymbol{\theta}) - \mathbb{E}[\ell(\boldsymbol{\gamma}, \boldsymbol{\theta})] + \mathbb{E}[\ell(\boldsymbol{\gamma}, \boldsymbol{\theta})] \\ &= \sum_{i \neq j} (a_{ij} - p_{ij})(Z_{ij}^\top \boldsymbol{\gamma} + \alpha_i + \beta_j) + \mathbb{E}[\ell(\boldsymbol{\gamma}, \boldsymbol{\theta})],\end{aligned}$$

where  $\mathbb{E}[\ell(\boldsymbol{\gamma}, \boldsymbol{\theta})]$  is given in (9) and  $p_{ij} = p_{ij}(\boldsymbol{\gamma}^*, \alpha_i^*, \beta_j^*)$ . By the triangle inequality, we have

$$\left| \frac{1}{n(n-1)} \sum_{i=1}^n \sum_{j \neq i} (a_{ij} - p_{ij}) Z_{ij}^\top \boldsymbol{\gamma} \right| \leq \frac{1}{n} \sum_{i=1}^n \left| \frac{1}{n-1} \sum_{j \neq i} (a_{ij} - p_{ij}) Z_{ij}^\top \boldsymbol{\gamma} \right|. \quad (1)$$

---

<sup>\*</sup>Department of Statistics, Central China Normal University, Wuhan, 430079, China. Email: tingyanty@mail.ccnu.edu.cn.

<sup>†</sup>Department of Applied Mathematics, The Hong Kong Polytechnic University, Hong Kong. Email: by.jiang@polyu.edu.hk.

<sup>‡</sup>Department of Statistics, Heinz College, Machine Learning Department, CyLab, Carnegie Mellon University, Pittsburgh, PA 15213, USA. Email: fienberg@stat.cmu.edu.

<sup>§</sup>Corresponding author. Department of Statistics, University of Warwick and Alan Turing Institute, Coventry, CV4 7AL, UK. Email: C.Leng@warwick.ac.uk.

Since we assume that  $Z_{ij}$ 's lie in a compact subset of  $\mathbb{R}^p$  and the parameter space  $\Theta$  of covariate parameters is compact, we have for all  $i \neq j$ ,

$$\max_{\gamma \in \Theta} |Z_{ij}^\top \gamma| \leq \kappa, \quad (2)$$

where  $\kappa$  is a constant. By inequality (2),  $a_{ij}Z_{ij}^\top \gamma$  is a bounded random variable with the upper bound  $\kappa$ . By Hoeffding's (1963) inequality, we have

$$P\left(\left|\frac{1}{n-1} \sum_{j \neq i} (a_{ij} - p_{ij}) Z_{ij}^\top \gamma\right| \geq \epsilon\right) \leq 2 \exp\left(-\frac{(n-1)\epsilon^2}{2\kappa^2}\right).$$

By taking  $\epsilon = 2\kappa[\log(n-1)/(n-1)]^{1/2}$ , we have

$$P\left(\left|\frac{1}{n-1} \sum_{j \neq i} (a_{ij} - p_{ij}) Z_{ij}^\top \gamma\right| \geq 2\kappa \sqrt{\frac{\log(n-1)}{(n-1)}}\right) \leq \frac{4}{(n-1)^2}.$$

Therefore, we have

$$\begin{aligned} & P\left(\left|\frac{1}{n(n-1)} \sum_{i=1}^n \sum_{j \neq i} (a_{ij} - p_{ij}) Z_{ij}^\top \gamma\right| \geq 2\kappa \sqrt{\frac{\log(n-1)}{(n-1)}}\right) \\ & \leq P\left(\frac{1}{n} \sum_{i=1}^n \left|\frac{1}{n-1} \sum_{j \neq i} (a_{ij} - p_{ij}) Z_{ij}^\top \gamma\right| \geq 2\kappa \sqrt{\frac{\log(n-1)}{(n-1)}}\right) \\ & \leq P\left(\bigcup_{i=1}^n \left|\frac{1}{n-1} \sum_{j \neq i} (a_{ij} - p_{ij}) Z_{ij}^\top \gamma\right| \geq 2\kappa \sqrt{\frac{\log(n-1)}{(n-1)}}\right) \\ & \leq \frac{n}{(n-1)^2}. \end{aligned}$$

In the above, the first inequality is due to (1). Note that  $\|\alpha\| \leq n^\tau$  and  $\|\beta\| \leq n^\tau$ . Similarly, with probability at most  $n/(n-1)^2$ , we have

$$\begin{aligned} \left|\frac{1}{n(n-1)} \sum_{i=1}^n \sum_{j \neq i} (a_{ij} - p_{ij}) \alpha_i\right| & \geq \frac{1}{n(n-1)} \sum_{i=1}^n \left|\sum_{j \neq i} \frac{\alpha_i}{n-1} (a_{ij} - p_{ij})\right| \\ & \geq \frac{1}{n(n-1)} \cdot n \cdot n^\tau \sqrt{\frac{\log(n-1)}{n-1}} = \frac{(\log n)^{1/2}}{n^{1/2-\tau}}, \end{aligned}$$

and

$$\left|\frac{1}{n(n-1)} \sum_{i=1}^n \sum_{j \neq i} (a_{ij} - p_{ij}) \beta_j\right| \geq \frac{(\log n)^{1/2}}{n^{1/2-\tau}}.$$

Hence, with probability at least  $1 - 3n/(n-1)^2$ , we have

$$\max_{\gamma \in \Gamma, \|\theta\|_\infty \leq n^\tau} \left| \frac{1}{n(n-1)} \sum_i \sum_{j \neq i} (a_{ij} - p_{ij}) (Z_{ij}^\top \gamma + \alpha_i + \beta_j) \right| < \frac{(\log n)^{1/2}}{n^{1/2-\tau}},$$

or equivalently,

$$\max_{\gamma \in \Gamma, \|\theta\|_\infty \leq n^\tau} \left| \frac{1}{n(n-1)} \{ \ell(\gamma, \theta) - \mathbb{E}[\ell(\gamma, \theta)] \} \right| < \frac{(\log n)^{1/2}}{n^{1/2-\tau}}. \quad (3)$$

Let  $B_n(\rho) = \{\gamma : \|\gamma - \gamma^*\|_\infty < \rho\}$  be an open ball in  $\Gamma$  with  $\gamma^*$  as its center and  $\rho$  as its radius, and  $B_n^c(\rho)$  be its complement in  $\Gamma$ . Define

$$\epsilon_n(\rho) = \frac{1}{n(n-1)} \left\{ \max_{\|\theta\|_\infty \leq n^\tau} \mathbb{E}[\ell(\gamma^*, \theta)] - \max_{\gamma \in B_n^c(\rho), \|\theta\|_\infty \leq n^\tau} \mathbb{E}[\ell(\gamma, \theta)] \right\},$$

and

$$\epsilon_n(\rho_n) = \arg \min_{\rho} \epsilon_n(\rho) > \frac{2(\log n)^{1/2}}{n^{1/2-\tau}}.$$

Recall that  $\mathbb{E}[\ell(\gamma^*, \theta)] = \sum_{i < j} D_{KL}(p_{ij} \| p_{ij}(\gamma^*, \alpha_i, \beta_j)) - \sum_{i < j} S(p_{ij})$ . Therefore,

$$\begin{aligned} & \max_{\|\theta\|_\infty \leq n^\tau} \mathbb{E}[\ell(\gamma^*, \theta)] - \max_{\gamma \in B_n^c(\rho), \|\theta\|_\infty \leq n^\tau} \mathbb{E}[\ell(\gamma, \theta)] \\ &= \max_{\|\theta\|_\infty \leq n^\tau} \sum_{i < j} D_{KL}(p_{ij} \| p_{ij}(\gamma^*, \alpha_i, \beta_j)) - \max_{\gamma \in B_n^c(\rho), \|\theta\|_\infty \leq n^\tau} \sum_{i < j} D_{KL}(p_{ij} \| p_{ij}(\gamma^*, \alpha_i, \beta_j)). \end{aligned}$$

By the property of the Kullback-Leibler divergence and noticing that  $p_{ij}$  is a monotonous function on  $\gamma_k$ ,  $\alpha_i$  and  $\beta_j$ ,  $\mathbb{E}[\ell(\gamma, \theta)]$  is uniquely maximized at  $(\gamma^*, \theta^*)$ . Therefore,  $\epsilon_n$  will be strictly greater than zero for each fixed  $n$ . Further, since  $\epsilon_n(\rho)$  is a continuous increasing function on  $\rho$  as  $\rho$  increases, we have

$$\rho_n \rightarrow 0, \quad \text{as } n \rightarrow \infty. \quad (4)$$

Let  $E_n$  be the event

$$\frac{1}{n(n-1)} \left| \max_{\|\theta\|_\infty \leq n^\tau} \ell(\gamma, \theta) - \max_{\|\theta\|_\infty \leq n^\tau} \mathbb{E}[\ell(\gamma, \theta)] \right| < \frac{\epsilon_n(\rho_n)}{2}.$$

for all  $\gamma \in \Gamma$ . Under event  $E_n$ , we get the inequalities

$$\max_{\|\theta\|_\infty \leq n^\tau} \frac{1}{n(n-1)} \mathbb{E}[\ell(\hat{\gamma}, \theta)] > \frac{1}{n(n-1)} \ell(\hat{\gamma}, \hat{\theta}) - \frac{\epsilon_n(\rho_n)}{2}, \quad (5)$$

$$\max_{\|\boldsymbol{\theta}\|_\infty \leq n^\tau} \frac{1}{n(n-1)} \ell(\boldsymbol{\gamma}^*, \boldsymbol{\theta}) > \max_{\|\boldsymbol{\theta}\|_\infty \leq n^\tau} \frac{1}{n(n-1)} \mathbb{E}[\ell(\boldsymbol{\gamma}^*, \boldsymbol{\theta})] - \frac{\epsilon_n(\rho_n)}{2}. \quad (6)$$

According to the definition of the restricted MLE, we have that

$$\frac{1}{n(n-1)} \ell(\hat{\boldsymbol{\gamma}}, \hat{\boldsymbol{\theta}}) \geq \max_{\|\boldsymbol{\theta}\|_\infty \leq n^\tau} \frac{1}{n(n-1)} \ell(\hat{\boldsymbol{\gamma}}, \boldsymbol{\theta}).$$

Then, by inequality (5), we have

$$\max_{\|\boldsymbol{\theta}\|_\infty \leq n^\tau} \frac{1}{n(n-1)} \mathbb{E}[\ell(\hat{\boldsymbol{\gamma}}, \boldsymbol{\theta})] > \max_{\|\boldsymbol{\theta}\|_\infty \leq n^\tau} \frac{1}{n(n-1)} \ell(\hat{\boldsymbol{\gamma}}, \boldsymbol{\theta}) - \frac{\epsilon_n}{2}. \quad (7)$$

Adding both sides of (6) and (7) gives

$$\begin{aligned} & \max_{\|\boldsymbol{\theta}\|_\infty \leq n^\tau} \frac{1}{n(n-1)} \mathbb{E}[\ell(\hat{\boldsymbol{\gamma}}, \boldsymbol{\theta})] - \left[ \max_{\|\boldsymbol{\theta}\|_\infty \leq n^\tau} \frac{1}{n(n-1)} \ell(\hat{\boldsymbol{\gamma}}, \boldsymbol{\theta}) - \max_{\|\boldsymbol{\theta}\|_\infty \leq n^\tau} \frac{1}{n(n-1)} \ell(\boldsymbol{\gamma}^*, \boldsymbol{\theta}) \right] \\ & > \max_{\|\boldsymbol{\theta}\|_\infty \leq n^\tau} \frac{1}{n(n-1)} \mathbb{E}[\ell(\boldsymbol{\gamma}^*, \boldsymbol{\theta})] - \epsilon_n(\rho_n) \\ & = \max_{\boldsymbol{\gamma} \in B_n^c, \|\boldsymbol{\theta}\|_\infty \leq n^\tau} \frac{1}{n(n-1)} \mathbb{E}[\ell(\boldsymbol{\gamma}, \boldsymbol{\theta})], \end{aligned}$$

where the equality follows the definition of  $\epsilon_n$ . By noting that

$$\max_{\|\boldsymbol{\theta}\|_\infty \leq n^\tau} \frac{1}{n(n-1)} \ell(\hat{\boldsymbol{\gamma}}, \boldsymbol{\theta}) \geq \max_{\|\boldsymbol{\theta}\|_\infty \leq n^\tau} \frac{1}{n(n-1)} \ell(\boldsymbol{\gamma}^*, \boldsymbol{\theta}),$$

we have

$$\max_{\|\boldsymbol{\theta}\|_\infty \leq n^\tau} \frac{1}{n(n-1)} \mathbb{E}[\ell(\hat{\boldsymbol{\gamma}}, \boldsymbol{\theta})] > \max_{\boldsymbol{\gamma} \in B_n^c, \|\boldsymbol{\theta}\|_\infty \leq n^\tau} \frac{1}{n(n-1)} \mathbb{E}[\ell(\boldsymbol{\gamma}, \boldsymbol{\theta})].$$

From the above equation, we have that  $E_n \Rightarrow \hat{\boldsymbol{\gamma}} \in B_n(\rho_n)$ . Therefore  $P(E_n) \leq P(\hat{\boldsymbol{\gamma}} \in B_n(\rho_n))$ .

Inequality (3) implies that  $\lim_{n \rightarrow \infty} P(E_n) = 1$  according to the definition of  $\rho_n$ . By (4), it follows that  $\hat{\boldsymbol{\gamma}} \xrightarrow{P} \boldsymbol{\gamma}^*$ .

## 1.2 Derivation of approximate expression for $I_*(\boldsymbol{\gamma})$

Recall that  $H$  is the Hessian matrix of the log-likelihood function (2):

$$H = \begin{pmatrix} H_{\gamma\gamma} & H_{\gamma\theta} \\ H_{\gamma\theta}^\top & -V \end{pmatrix},$$

where

$$-H_{\gamma\gamma} = \sum_{i \neq j} p_{ij}(1 - p_{ij})Z_{ij}Z_{ij}^\top, \quad (8)$$

and

$$-H_{\gamma\theta}^\top = \begin{pmatrix} \sum_{j \neq 1} p_{1j}(1 - p_{1j})Z_{1j}^\top \\ \vdots \\ \sum_{j \neq n} p_{nj}(1 - p_{nj})Z_{nj}^\top \\ \sum_{i \neq 1} p_{i1}(1 - p_{i1})Z_{i1}^\top \\ \vdots \\ \sum_{i \neq n-1} p_{i,n-1}(1 - p_{i,n-1})Z_{i,n-1}^\top \end{pmatrix}.$$

In what follows, we will derive the approximate expression of  $I_*(\gamma)$ . Let  $(1)_{m \times n}$  be an  $m \times n$  matrix whose elements all are 1. By calculations, we have

$$SH_{\gamma\theta}^\top = DH_{\gamma\theta}^\top + \frac{1}{v_{2n,2n}} \begin{pmatrix} (1)_{n \times n} & (-1)_{n \times (n-1)} \\ (-1)_{(n-1) \times n} & (1)_{(n-1) \times (n-1)} \end{pmatrix} H_{\gamma\theta}^\top,$$

where  $D = \text{diag}(1/v_{11}, \dots, 1/v_{2n-1,2n-1})$ . By noting that

$$\sum_{i=1}^n \sum_{j \neq i} p_{ij}(1 - p_{ij})Z_{ij}^\top - \sum_{j=1}^{n-1} \sum_{i \neq j} p_{ij}(1 - p_{ij})Z_{ij}^\top = \sum_{i \neq n} p_{in}(1 - p_{in})Z_{in}^\top,$$

we have

$$\begin{aligned} H_{\gamma\theta}SH_{\gamma\theta}^\top &= H_{\gamma\theta}DH_{\gamma\theta}^\top + \frac{1}{v_{2n,2n}}H_{\gamma\theta} \begin{pmatrix} (1)_{n \times 1} \\ (-1)_{(n-1) \times 1} \end{pmatrix} \sum_{i \neq n} p_{in}(1 - p_{in})Z_{in}^\top \\ &= \sum_{i=1}^n \frac{1}{v_{ii}} \left( \sum_{j \neq i} p_{ij}(1 - p_{ij})Z_{ij} \right) \left( \sum_{j \neq i} p_{ij}(1 - p_{ij})Z_{ij}^\top \right) \\ &\quad + \sum_{j=1}^n \frac{1}{v_{n+j,n+j}} \left( \sum_{i \neq j} p_{ij}(1 - p_{ij})Z_{ij} \right) \left( \sum_{i \neq j} p_{ij}(1 - p_{ij})Z_{ij}^\top \right). \end{aligned} \quad (9)$$

By Lemma 1, we have

$$\|V^{-1} - S\| \leq \frac{c_1 M^2}{m^3(n-1)} \leq \frac{c_1}{(n-1)^2} \times \left(\frac{1}{4}\right)^2 \times \frac{(1 + e^{2\|\theta^*\|_\infty + \kappa})^6}{(e^{2\|\theta^*\|_\infty + \kappa})^3} = O\left(\frac{e^{6\|\theta^*\|_\infty}}{n^2}\right).$$

Therefore,

$$\|H_{\gamma\theta}(V^{-1} - S)H_{\gamma\theta}^\top\|_\infty \leq \|H_{\gamma\theta}\|_\infty^2 \|V^{-1} - S\|_\infty \leq O(n^2) \times O\left(n \frac{e^{6\|\theta^*\|_\infty}}{n^2}\right) = O(ne^{6\|\theta^*\|_\infty}).$$

Recall that  $N = n(n-1)$  and note that

$$(H_{\gamma\gamma} + H_{\gamma\theta}V^{-1}H_{\gamma\theta}^\top) = H_{\gamma\gamma} + H_{\gamma\theta}SH_{\gamma\theta}^\top + H_{\gamma\theta}(V^{-1} - S)H_{\gamma\theta}^\top.$$

Therefore, we have

$$-N^{-1}(H_{\gamma\gamma} + H_{\gamma\theta}V^{-1}H_{\gamma\theta}^\top) = -N^{-1}(H_{\gamma\gamma} + H_{\gamma\theta}SH_{\gamma\theta}^\top) + o(1), \quad (10)$$

where  $H_{\gamma\gamma}$  and  $H_{\gamma\theta}SH_{\gamma\theta}^\top$  are given in (8) and (9), respectively. It shows that the limit of  $-N^{-1}(H_{\gamma\gamma} + H_{\gamma\theta}SH_{\gamma\theta}^\top)$  is  $I_*(\gamma)$  defined in (10).

### 1.3 Proofs for Theorem 4

Let  $\hat{\boldsymbol{\theta}}^* = \arg \max_{\boldsymbol{\theta}} \ell(\gamma^*, \boldsymbol{\theta})$ . Similar to the proofs of Theorems 1 and 2 in Yan et al. (2016), we have two lemmas below, which will be used in the proof of Theorem 4.

**Lemma 1.** *Assume that  $\boldsymbol{\theta}^* \in \mathbb{R}^{2n-1}$  with  $\|\boldsymbol{\theta}^*\|_\infty \leq \tau \log n$ , where  $0 < \tau < 1/24$  is a constant, and that  $A \sim \mathbb{P}_{\boldsymbol{\theta}^*}$ . Then as  $n$  goes to infinity, with probability approaching one, the  $\hat{\boldsymbol{\theta}}^*$  exists and satisfies*

$$\|\hat{\boldsymbol{\theta}}^* - \boldsymbol{\theta}^*\|_\infty = O_p\left(\frac{(\log n)^{1/2} e^{8\|\boldsymbol{\theta}^*\|_\infty}}{n^{1/2}}\right) = o_p(1).$$

**Lemma 2.** *If  $\|\boldsymbol{\theta}^*\|_\infty \leq \tau \log n$  and  $\tau < 1/40$ , then for any  $i$ ,*

$$\hat{\theta}_i^* - \theta_i^* = [S\{\mathbf{g} - \mathbb{E}(\mathbf{g})\}]_i + o_p(n^{-1/2}).$$

For convenience, define  $\ell_{ij}(\gamma, \boldsymbol{\theta})$  by the  $(i, j)^{th}$  dyad's contributions to the log-likelihood function in (2), i.e.,

$$\ell_{ij}(\gamma, \boldsymbol{\theta}) = a_{ij}(Z_{ij}^\top \gamma + \alpha_i + \beta_j) - \log(1 + e^{Z_{ij}^\top \gamma + \alpha_i + \beta_j}).$$

Let  $T_{ij}$  be a  $2n-1$  dimensional vector with ones in its  $i$ th and  $n+j$ th elements and zeros otherwise. Let  $s_{\gamma_{ij}}(\gamma, \boldsymbol{\theta})$  and  $s_{\theta_{ij}}(\gamma, \boldsymbol{\theta})$  denote the score of  $\ell_{ij}(\gamma, \boldsymbol{\theta})$  associated with the vector parameter  $\gamma$  and  $\boldsymbol{\theta}$ , respectively:

$$s_{\gamma_{ij}}(\gamma, \boldsymbol{\theta}) = \frac{\partial \ell_{ij}}{\partial \gamma} = a_{ij}Z_{ij} - \frac{Z_{ij}e^{Z_{ij}^\top \gamma + \alpha_i + \beta_j}}{1 + e^{Z_{ij}^\top \gamma + \alpha_i + \beta_j}},$$

$$s_{\theta_{ij}}(\boldsymbol{\gamma}, \boldsymbol{\theta}) = \frac{\partial \ell_{ij}}{\partial \boldsymbol{\theta}} = a_{ij} T_{ij} - \frac{e^{Z_{ij}^\top \boldsymbol{\gamma} + \alpha_i + \beta_j}}{1 + e^{Z_{ij}^\top \boldsymbol{\gamma} + \alpha_i + \beta_j}} T_{ij}.$$

Then we have the following lemma, whose proof is given in online supplementary material.

**Lemma 3.** *Let  $H_{\boldsymbol{\theta}\boldsymbol{\theta}} = -V$  and*

$$s_{\gamma_{ij}}^*(\boldsymbol{\gamma}^*, \boldsymbol{\theta}^*) := s_{\gamma_{ij}}(\boldsymbol{\gamma}^*, \boldsymbol{\theta}^*) - H_{\boldsymbol{\gamma}\boldsymbol{\theta}} H_{\boldsymbol{\theta}\boldsymbol{\theta}}^{-1} s_{\theta_{ij}}(\boldsymbol{\gamma}^*, \boldsymbol{\theta}^*). \quad (11)$$

*Then  $\frac{1}{\sqrt{N}}[I_n(\boldsymbol{\gamma}^*)]^{-1/2} \sum_{i=1}^n \sum_{j \neq i} s_{\gamma_{ij}}^*(\boldsymbol{\gamma}^*, \boldsymbol{\theta}^*)$  follows asymptotically a  $p$ -dimensional multivariate standard normal distribution.*

*Proof of Theorem 4.* Recall that  $\widehat{\boldsymbol{\theta}}(\boldsymbol{\gamma}) = \arg \max_{\boldsymbol{\theta}} \ell(\boldsymbol{\gamma}, \boldsymbol{\theta})$ . A mean value expansion gives

$$\sum_{i=1}^n \sum_{j \neq i} s_{\gamma_{ij}}(\widehat{\boldsymbol{\gamma}}, \widehat{\boldsymbol{\theta}}) - \sum_{i=1}^n \sum_{j \neq i} s_{\gamma_{ij}}(\boldsymbol{\gamma}^*, \widehat{\boldsymbol{\theta}}(\boldsymbol{\gamma}^*)) = \sum_{i=1}^n \sum_{j \neq i} \frac{\partial}{\partial \boldsymbol{\gamma}^\top} s_{\gamma_{ij}}(\bar{\boldsymbol{\gamma}}, \widehat{\boldsymbol{\theta}}(\bar{\boldsymbol{\gamma}}))(\widehat{\boldsymbol{\gamma}} - \boldsymbol{\gamma}^*),$$

where  $\bar{\boldsymbol{\gamma}} = t\boldsymbol{\gamma}^* + (1-t)\widehat{\boldsymbol{\gamma}}$  for some  $t \in (0, 1)$ . By noting that  $\sum_{i=1}^n \sum_{j \neq i} s_{\gamma_{ij}}(\widehat{\boldsymbol{\gamma}}, \widehat{\boldsymbol{\theta}}) = 0$ , we have

$$\sqrt{N}(\widehat{\boldsymbol{\gamma}} - \boldsymbol{\gamma}^*) = - \left[ \frac{1}{N} \sum_{i=1}^n \sum_{j \neq i} \frac{\partial}{\partial \boldsymbol{\gamma}^\top} s_{\gamma_{ij}}(\bar{\boldsymbol{\gamma}}, \widehat{\boldsymbol{\theta}}(\bar{\boldsymbol{\gamma}})) \right]^{-1} \times \left[ \frac{1}{\sqrt{N}} \sum_{i=1}^n \sum_{j \neq i} s_{\gamma_{ij}}(\boldsymbol{\gamma}^*, \widehat{\boldsymbol{\theta}}(\boldsymbol{\gamma}^*)) \right].$$

Since the dimension  $p$  of  $\boldsymbol{\gamma}$  is fixed, by Theorem 2, we have

$$- \frac{1}{N} \sum_{i=1}^n \sum_{j \neq i} \frac{\partial}{\partial \boldsymbol{\gamma}^\top} s_{\gamma_{ij}}(\bar{\boldsymbol{\gamma}}, \widehat{\boldsymbol{\theta}}(\bar{\boldsymbol{\gamma}})) \xrightarrow{p} I_*(\boldsymbol{\gamma}).$$

Let  $\widehat{\boldsymbol{\theta}}^* = \widehat{\boldsymbol{\theta}}(\boldsymbol{\gamma}^*)$ . Therefore,

$$\sqrt{N}(\widehat{\boldsymbol{\gamma}} - \boldsymbol{\gamma}^*) = I_*^{-1}(\boldsymbol{\gamma}) \times \left[ \frac{1}{\sqrt{N}} \sum_{i=1}^n \sum_{j \neq i} s_{\gamma_{ij}}(\boldsymbol{\gamma}^*, \widehat{\boldsymbol{\theta}}^*) \right] + o_p(1). \quad (12)$$

By applying a third order Taylor expansion to the summation in brackets in (12), it yields

$$\frac{1}{\sqrt{N}} \sum_{i=1}^n \sum_{j \neq i} s_{\gamma_{ij}}(\boldsymbol{\gamma}^*, \widehat{\boldsymbol{\theta}}^*) = S_1 + S_2 + S_3, \quad (13)$$

where

$$\begin{aligned} S_1 &= \frac{1}{\sqrt{N}} \sum_{i=1}^n \sum_{j \neq i} s_{\gamma_{ij}}(\gamma^*, \theta^*) + \frac{1}{\sqrt{N}} \sum_{i=1}^n \sum_{j \neq i} \left[ \frac{\partial}{\partial \theta^\top} s_{\gamma_{ij}}(\gamma^*, \theta^*) \right] (\hat{\theta}^* - \theta^*), \\ S_2 &= \frac{1}{2\sqrt{N}} \sum_{k=1}^{2n-1} \left[ (\hat{\theta}_k^* - \theta_k^*) \sum_{i=1}^n \sum_{j \neq i} \frac{\partial^2}{\partial \theta_k \partial \theta^\top} s_{\gamma_{ij}}(\gamma^*, \theta^*) \times (\hat{\theta}^* - \theta^*) \right], \\ S_3 &= \frac{1}{6\sqrt{N}} \sum_{k=1}^{2n-1} \sum_{l=1}^{2n-1} \{ (\hat{\theta}_k^* - \theta_k^*) (\hat{\theta}_l^* - \theta_l^*) \left[ \sum_{i=1}^n \sum_{j \neq i} \frac{\partial^3 s_{\gamma_{ij}}(\gamma^*, \bar{\theta}^*)}{\partial \theta_k \partial \theta_l \partial \theta^\top} \right] (\hat{\theta}^* - \theta^*) \}. \end{aligned}$$

Similar to the proof of Theorem 4 in Graham (2017), we will show that (1)  $S_1$  is asymptotically normal distribution; (2)  $S_2$  is the bias term having a non-zero probability limit; (3)  $S_3$  is an asymptotically negligible remainder term.

We work with  $S_1$ ,  $S_2$  and  $S_3$  in reverse order. We first evaluate the term  $S_3$ . We calculate  $g_{klh}^{ij} = \frac{\partial^3 s_{\gamma_{ij}}(\gamma, \theta)}{\partial \theta_k \partial \theta_l \partial \theta_h}$  as follows.

- (1) For different  $k, l, h$ ,  $g_{klh}^{ij} = 0$ .
- (2) Only two values are equal. If  $k = l = i \leq n; h \geq n+1$ ,  $g_{klh}^{ij} = p_{ij}(1 - p_{ij})(1 - 6p_{ij} + 6p_{ij}^2)Z_{ij}$ ; for other cases, the results are similar.
- (3) Three values are equal.  $g_{klh}^{ij} = p_{ij}(1 - p_{ij})(1 - 6p_{ij} + 6p_{ij}^2)Z_{ij}$  if  $k = l = h = i \leq n$ ;  $g_{klh}^{ij} = p_{ji}(1 - p_{ji})(1 - 6p_{ji} + 6p_{ji}^2)Z_{ji}$  if  $k = l = h = j \geq n+1$ .

Therefore, we have

$$\begin{aligned} & \sum_{i=1}^n \sum_{j \neq i} \sum_{k,l,h} \frac{\partial^3 s_{\gamma_{ij}}(\gamma^*, \bar{\theta}^*)}{\partial \theta_k \partial \theta_l \partial \theta_h} \\ &= \frac{1}{2} \frac{1}{\sqrt{N}} \sum_{i=1}^n \sum_{j=1}^{n-1} Z_{ij} [p_{ij}(1 - p_{ij})(1 - 6p_{ij} + 6p_{ij}^2)(\hat{\alpha}_i - \alpha_i^*)^2(\hat{\beta}_j - \beta_j^*) + \\ & \quad p_{ji}(1 - p_{ji})(1 - 6p_{ji} + 6p_{ji}^2)(\hat{\alpha}_i - \alpha_i^*)(\hat{\beta}_j - \beta_j^*)^2]. \end{aligned}$$

Let  $\lambda_n = \|\hat{\theta}^* - \theta^*\|_\infty$ . Note that  $Z_{ij}$  lies in a compact set  $\mathbb{Z}$ , and  $p_{ij}(1 - p_{ij}) \leq 1/4$ , and  $|(1 - 6p_{ij} + 6p_{ij}^2)| \leq 6$ . By Lemma 1, any element of  $S_3$  is bounded above by

$$\begin{aligned} \frac{n(n-1)}{\sqrt{N}} \times \frac{6}{4} \lambda_n^3 \times \sup_{z \in \mathbb{Z}} |z| &= 3 \frac{n(n-1)}{\sqrt{n(n-1)}} \times \frac{C^3 (\log n)^{3/2} e^{24\|\theta^*\|_\infty}}{n^{3/2}} \times \sup_{z \in \mathbb{Z}} |z| \\ &= O\left(\frac{(\log n)^{3/2} e^{24\|\theta^*\|_\infty}}{\sqrt{n}}\right) = o(1). \end{aligned}$$

Similar to the calculation of deriving the asymptotic bias in Theorem 4 in Graham (2017),



we have  $S_2 = B_* + o_p(1)$ , where

$$B_* = \lim_{n \rightarrow \infty} \frac{1}{2\sqrt{N}} \left[ \sum_{i=1}^n \frac{\sum_{j \neq i} p_{ij}(1 - p_{ij})(1 - 2p_{ij})Z_{ij}}{\sum_{j \neq i} p_{ij}(1 - p_{ij})} + \sum_{j=1}^n \frac{\sum_{i \neq j} p_{ij}(1 - p_{ij})(1 - 2p_{ij})Z_{ij}}{\sum_{i \neq j} p_{ij}(1 - p_{ij})} \right]. \quad (14)$$

By Lemma 2, similar to deriving the asymptotic expression of  $S_1$  in Graham (2017), we have

$$S_1 = \frac{1}{\sqrt{N}} \sum_{i=1}^n \sum_{j \neq i} s_{\gamma_{ij}}^*(\gamma^*, \theta^*) + o_p(1),$$

Therefore, it shows that equation (13) equal to

$$\frac{1}{\sqrt{N}} \sum_{i=1}^n \sum_{j \neq i} s_{\gamma_{ij}}(\gamma^*, \hat{\theta}^*) = \frac{1}{\sqrt{N}} \sum_{i=1}^n \sum_{j \neq i} s_{\gamma_{ij}}^*(\gamma^*, \theta^*) + B_* + o_p(1), \quad (15)$$

with  $\frac{1}{\sqrt{N}} \sum_{i=1}^n \sum_{j \neq i} s_{\gamma_{ij}}^*(\gamma^*, \theta^*)$  equivalent to the first two terms in (13) and  $B_*$  the probability limit of the third term in (13).

Substituting (15) into (12) then gives

$$\sqrt{N}(\hat{\gamma} - \gamma^*) = I_*^{-1}(\gamma)B_* + I_*^{-1}(\gamma)\frac{1}{\sqrt{N}} \sum_{i=1}^n \sum_{j \neq i} s_{\gamma_{ij}}^*(\gamma^*, \theta^*) + o_p(1).$$

Then Theorem 4 immediately follows from Lemma 3.  $\square$

## References

- Graham, B. S. (2017). An econometric model of link formation with degree heterogeneity. *Econometrica*, **85**, 1033–1063.
- Hoeffding, W. (1963). Probability inequalities for sums of bounded random variables. *Journal of the American Statistical Association*, **58**, 13–30.
- Loève, M. (1977). *Probability theory I*. 4th ed. Springer, New York.
- Yan, T., Leng, C., and Zhu, J. (2016). Asymptotics in directed exponential random graph models with an increasing bi-degree sequence. *The Annals of Statistics*, **44**, 31–57.
