# Supplementary material
Source: publisher figshare collection journal article supplement (https://tandf.figshare.com/articles/dataset/_/5985001)
Supplement: Supplementary file 3 [file 2]

Archive with 2 entries (2 files):
- Supplement.pdf
- p0covariate -appendix.pdf
